# Supplementary material for: A Diagnostic Algorithm To Investigate Pyrazinamide and Ethambutol Resistance in Rifampin-Resistant Mycobacterium tuberculosis Isolates in a Low-Incidence Setting
Source: PubMed Central journal article supplement (PMC6355586; doi:10.1128/aac.01798-18), 2019-01-29
Supplement: d56d112737a937d5acbc7ab6b0c81270_AAC.01798-18-s0002.pdf [file d56d112737a937d5acbc7ab6b0c81270_AAC.01798-18-s0002.pdf]

Supplemental Table 1: Molecular and phenotypic drug susceptibility data, accession numbers and genotype information for all isolates included in this study.

Supplemental Figure 1: Phylogenetic distribution of included isolates. Circular phylogramm of a maximum likelihood analysis inferred from 9472 SNPs positions shows that all major lineages are represented in our study sample. L = lineage; EAI = East African Indian

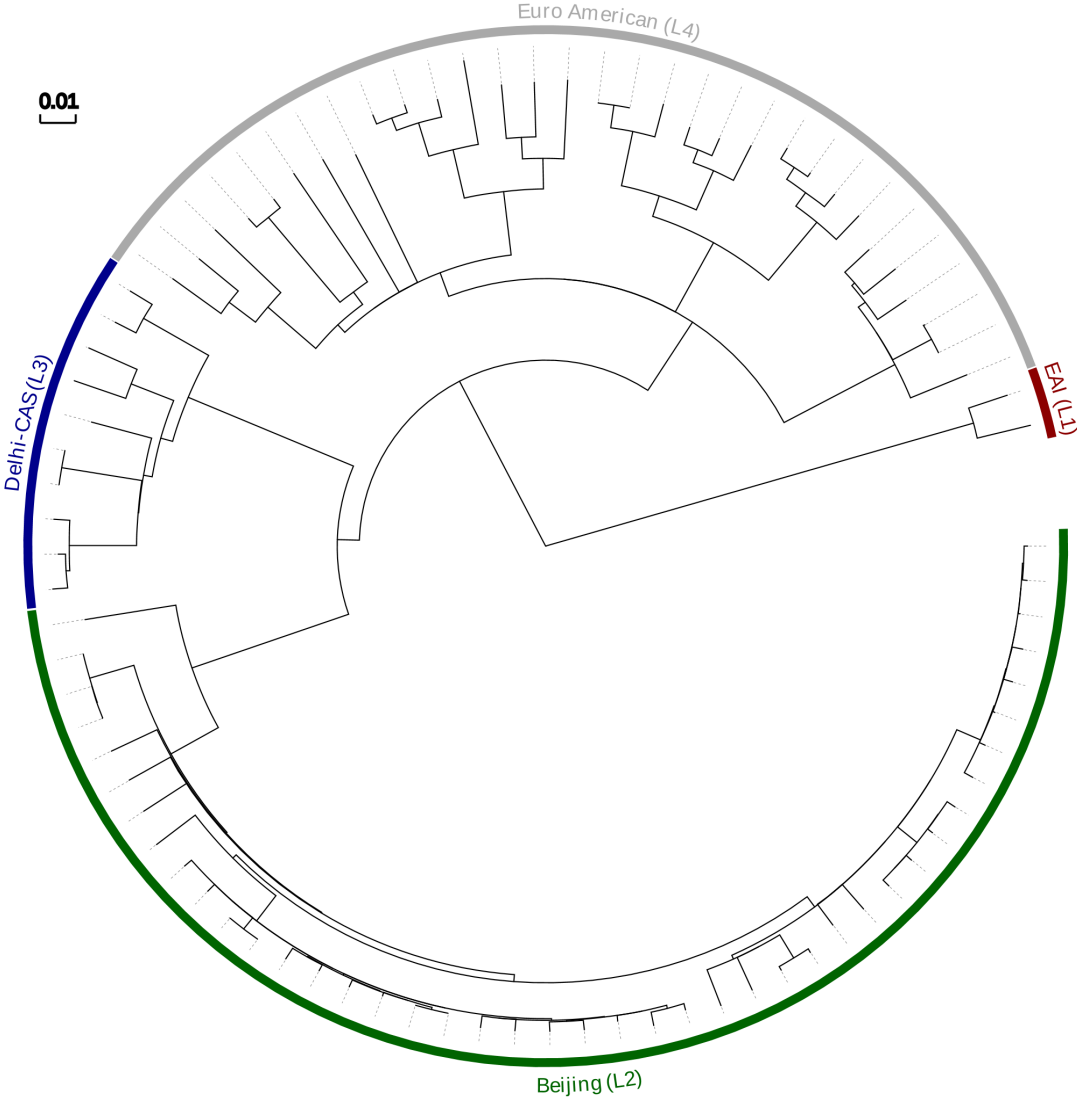

Supplemental table 2: (A) PCR-primer sequences used for Sanger sequencing around the *embB306* codon and (B) PCR-primer sequences suggested to be used to amplify an extended region of the *embB* gene

A. PCR used in routine diagnostics to amplify the respective *embB* region

| Target      | Primer                   | Sequence<br>(5'-3') | Nucleotide<br>Positions | Codon<br>positions | Size<br>(bp) |
|-------------|--------------------------|---------------------|-------------------------|--------------------|--------------|
| <i>embB</i> | OG240 ( <i>embF545</i> ) | CgTTCCggCCTgCAT     | 764-778                 | 255                | 344          |
|             | OG243 ( <i>embR887</i> ) | ACCTCACgCgACAgCA    | 1106-1091               | 369                |              |

B. Validated PCR primers suggested to use for diagnostics to amplify the extended *embB* region

| Target      | Primer      | Sequence<br>(5'-3')  | Nucleotide<br>Positions | Codon<br>positions | Size<br>(bp) |
|-------------|-------------|----------------------|-------------------------|--------------------|--------------|
| <i>embB</i> | Emb297-497F | TATTCggCTTCCTgCTCTgg | 851-870                 | 284                | 797          |
|             | Emb297-497R | gCATAgCgCggTgATCAAAA | 1647-1628               | 549                |              |
